# Supplementary material for: Wasserstein Uncertainty Estimation for Adversarial Domain Matching
Source: Frontiers journal article supplement (doi:10.3389/fdata.2022.878716), 2022-05-10
Supplement: Data_Sheet_1.PDF [file Data_Sheet_1.PDF]

## Supplementary Material

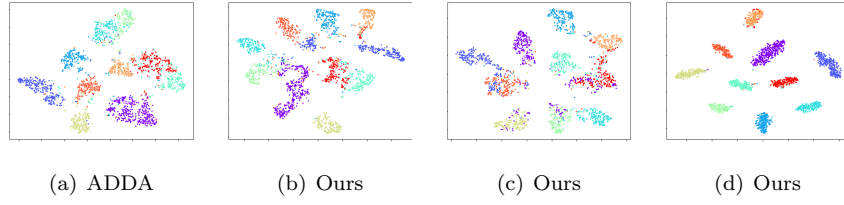

Figure 1:  $t$ -SNE plot of the feature domains for MNIST→USPS.

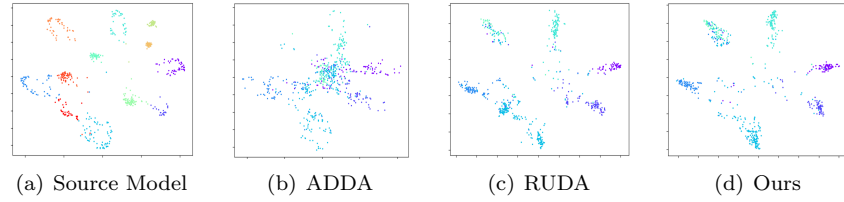

Figure 2:  $t$ -SNE embeddings of the representations for Syn12→Real6. The features are embedded into the same subspace and visualized within the same scope. (a) is the learnt source representation with 12 classes. (b)(c)(d) are the adapted target representation with 6 classes. The representation from our method consists of 6 disentangled clusters, while others tend to be more entangled or contains excessive number of clusters.
